# Supplementary material
Source: PubMed Central journal article supplement (PMC7614225)
Supplement: EMS159257-supplement-Recruitment_survey.pdf [file EMS159257-supplement-Recruitment_survey.pdf]

# PrEP: BMSM

(PrEP: BMSM)

## [Introduction page]

### Why are we doing this study?

HIV pre-exposure prophylaxis (PrEP) is a medical intervention where people who don't have HIV take HIV medicines before a risk event to keep from contracting the virus. PrEP is most frequently taken every day and is different to PEP which is only taken after possible exposure. The NHS is currently going through a process deciding whether or not to provide PrEP to those most at risk. Recognising that black men who have sex with men (MSM) are at higher risk of HIV than other groups, we're interested in talking to individuals about motivations and barriers to future PrEP use.

### What will it involve?

This interview will take place at a time of your choosing and will involve a conversation with you and a researcher. We will ask you questions about whether or not you have taken PrEP before, and if it's something you would consider in the future. To understand how different things might impact on your feelings around this we will ask you some questions about your social life, your sexual history and about your experiences accessing different health services that you might have come in contact with. The interview will take no more than 1.5 hours and you will be compensated £40 for your time. The interview will be audio-recorded.

### What happens after the interview?

After the interview everything that was said will be typed up by an external agency using the recording. This agency is specially selected by our institution for having strict confidentiality policies. Upon receiving the transcribed interview a researcher from Sigma will remove identifying details such as people's names and place names. At a later stage we will look for what is interesting or important from the interviews and write up a report about it.

### How will you protect my personal information?

We only keep your first name, contact telephone number and email address on file for a short time, and this will be destroyed as soon as your interview is completed. Access to this information, the recordings and the transcripts of the recordings will be strictly controlled and password protected with only researchers working directly on this project handling this data. In the report that we will write we will be careful to include nothing that could identify you and there will be no mention that you ever took part in the study.

### Can I change my mind about taking part?

Yes. If you change your mind during the interview then just tell the interviewer and s/he will allow you to leave and will destroy your contact details. If you decide after the interview that you do not wish the things you mentioned during the interview to be included in the report you have until one month after the interview to let us know.

### Who is Sigma Research?

Sigma Research is a social research group specialising in the social, behavioural and policy aspects of HIV and sexual health. It is part of the Faculty of Public Health and Policy at the London School of Hygiene & Tropical Medicine. We have spent almost 30 years researching the health and well-being of gay and bisexual men, as well as other communities who are affected by HIV. This particular research is being funded by the Wellcome Trust.

For more information contact the lead researcher, Charlie Witzel, 020 7927 2800 or email [Charles.witzel@lshtm.ac.uk](mailto:Charles.witzel@lshtm.ac.uk) [www.sigmaresearch.org.uk](http://www.sigmaresearch.org.uk)

### COMPULSORY QUESTION

I have read and understood the above information

### [Image only]

**Sigma**  
RESEARCH

LONDON  
SCHOOL of  
HYGIENE  
& TROPICAL  
MEDICINE

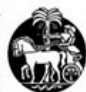

Supported by  
**wellcome**trust

## Some details about you

### How did you hear about this study? (select all that apply)

- Social media (Facebook / Twitter)
- Gay oriented app or website (Scruff, Growlr, Grindr, Gaydar, BBRT)
- Community organisation (THT, Positive East, PrEPster, IWPN etc)
- From a friend
- Through a mailing list (PROUD study, GMFA etc)

### How do you describe your gender?

- Male
- Female
- Trans Male
- Trans Female
- Non-binary
- Prefer not to say

### Were you born in the UK?

- Yes
- No

### How old are you?

#### COMPULSORY QUESTION

- under 18
- 18
- 19
- 20
- 21
- 22
- 23
- 24
- 25

- 26
- 27
- 28
- 29
- 30
- 31
- 32
- 33
- 34
- 35
- 36
- 37
- 38
- 39
- 40
- 41
- 42
- 43
- 44
- 45
- 46
- 47
- 48
- 49
- 50
- 51
- 52
- 53
- 54
- 55
- 56
- 57
- 58
- 59
- 60
- 61
- 62
- 63
- 64
- 65
- 66
- 67
- 68
- 69
- 70
- 71
- 72
- 73
- 74
- 75
- 76
- 77
- 78
- 79
- 80
- 81
- 82
- 83
- 84
- 85
- 86
- 87
- 88
- 89
- 90
- 91
- 92
- 93
- 94
- 95
- 96
- 97
- 98
- 99
- 100
- over 100

**What is your highest educational qualification?**

- I have no educational qualifications

- GCSEs/CSEs/O-Levels or equivalent
- A-Levels or equivalent
- Higher education below degree level (eg. HNC, HND)
- Degree or higher
- Other

**What ethnic group best describes you?**

**COMPULSORY QUESTION**

- BLACK / BLACK BRITISH: African
- BLACK / BLACK BRITISH: Caribbean
- BLACK / BLACK BRITISH: Any other Black background
- MIXED / MULTIPLE: White and Black Caribbean
- MIXED / MULTIPLE: White and Black African
- MIXED / MULTIPLE: White and Asian
- MIXED / MULTIPLE: Any other mixed/multiple background
- WHITE: English / Welsh / Scottish / Northern Irish / British
- WHITE: Irish
- WHITE: Gypsy or Irish Traveller
- WHITE: Any other white background
- ASIAN / ASIAN BRITISH: Indian
- ASIAN / ASIAN BRITISH: Pakistani
- ASIAN / ASIAN BRITISH: Bangladeshi
- ASIAN / ASIAN BRITISH: Chinese
- ASIAN / ASIAN BRITISH: Any other Asian background
- OTHER: Arab
- OTHER: Any other ethnic group

**Which of the following options best describes how you think of yourself?**

**COMPULSORY QUESTION**

- Gay or homosexual
- Bisexual
- Straight or heterosexual
- Queer
- Any other term
- I don't usually use a term

**In the last 12 months have you had sexual contact with...**

**ANSWER THIS QUESTION IF ANSWER TO QUESTION WHICH OF THE FOLLOWING OPTIONS BEST DESCRIBES HOW YOU THINK OF YOURSELF? IS ANY OF BISEXUAL, STRAIGHT OR HETEROSEXUAL, ANY OTHER TERM, I DON'T USUALLY USE A TERM**

- No one
- Women only
- Both men and women
- Men only

**How many men have you had intercourse with in the last 3 months? (By intercourse we mean fucking, or anal sex)**

**COMPULSORY QUESTION**

- 0
- 1
- 2-5
- 6-10
- 10+

**How many men did you have condomless intercourse with in the last 3 months? (By intercourse we mean fucking, or anal sex)**

**COMPULSORY QUESTION**

- 0
- 1
- 2-5
- 6-10
- 10+

**When did you last test for HIV?**

**COMPULSORY QUESTION**

- In the last 3 months
- In the last 12 months
- In the last 12 - 24 months
- In the last 3 years
- More than 3 years ago
- I have never tested for HIV

**What was your last HIV test result?**

**ANSWER THIS QUESTION IF ANSWER TO QUESTION WHEN DID YOU LAST TEST FOR HIV? IS ANY OF IN THE LAST 3 MONTHS, IN THE LAST 12 MONTHS, IN THE LAST 12 - 24 MONTHS, IN THE LAST 3 YEARS**

**COMPULSORY QUESTION**

- I don't know
- Negative
- Positive

**[Exit Page]**

**IF ANSWER THIS PAGE IF ANSWER TO QUESTION WHAT ETHNIC GROUP BEST DESCRIBES YOU? IS ANY OF MIXED / MULTIPLE: WHITE AND ASIAN, WHITE: ENGLISH / WELSH / SCOTTISH /**

NORTHERN IRISH / BRITISH, WHITE: IRISH, WHITE: GYPSY OR IRISH TRAVELLER, WHITE: ANY OTHER WHITE BACKGROUND, ASIAN / ASIAN BRITISH: INDIAN, ASIAN / ASIAN BRITISH: PAKISTANI, ASIAN / ASIAN BRITISH: BANGLADESHI, ASIAN / ASIAN BRITISH: CHINESE, ASIAN / ASIAN BRITISH: ANY OTHER ASIAN BACKGROUND, OTHER: ARAB OR ANSWER TO QUESTION HOW DO YOU DESCRIBE YOUR GENDER? IS ANY OF FEMALE, TRANS FEMALE, NON-BINARY OR ANSWER TO QUESTION HOW OLD ARE YOU? IS ANY OF UNDER 18 THEN YOU DO NOT NEED TO ANSWER ANY PAGES AFTER THIS ONE

Thank you very much for your time and interest in our research.

For these interviews we are looking for participants who are over the age of 18, describe their ethnicity as black, are male and have sex with other men and do not have diagnosed HIV. From your responses it looks like you do not fit our criteria for participation. Sorry but thanks very much for your time.

ANSWER THIS QUESTION IF ANSWER TO QUESTION WHAT ETHNIC GROUP BEST DESCRIBES YOU? IS ANY OF BLACK / BLACK BRITISH: AFRICAN, BLACK / BLACK BRITISH: CARIBBEAN, BLACK / BLACK BRITISH: ANY OTHER BLACK BACKGROUND, MIXED / MULTIPLE: WHITE AND BLACK CARIBBEAN, MIXED / MULTIPLE: ANY OTHER MIXED/MULTIPLE BACKGROUND, WHITE: IRISH, WHITE: GYPSY OR IRISH TRAVELLER, WHITE: ANY OTHER WHITE BACKGROUND, ASIAN / ASIAN BRITISH: INDIAN, ASIAN / ASIAN BRITISH: PAKISTANI, OTHER: ARAB, OTHER: ANY OTHER ETHNIC GROUP OR ANSWER TO QUESTION WHAT WAS YOUR LAST HIV TEST RESULT? IS ANY OF POSITIVE OR ANSWER TO QUESTION HOW OLD ARE YOU? IS ANY OF UNDER 18

## About PrEP

PrEP stands for pre-exposure HIV prophylaxis. It's a way of preventing HIV infection by taking a pill on an ongoing basis before sex. It's taken by someone who doesn't have HIV, to prevent them from getting HIV. The PrEP pill is an antiretroviral drug – the same type of pill taken by someone who already has HIV to treat HIV.

**Have you heard of PrEP before now?**

- No
- Yes

**Do you know anyone who has received PrEP?**

- No
- Yes

**Have you ever tried to get PrEP?**

- No
- Yes

**Have you ever taken PrEP?**

- No
- Yes

**Where did you get your PrEP drugs from?**

ANSWER THIS QUESTION IF ANSWER TO QUESTION HAVE YOU EVER TAKEN PREP? IS ANY OF YES

- I'm a participant in the PROUD study.
- I bought it from an online pharmacy.
- A friend gave it to me.
- I got PEP (Post-Exposure Prophylaxis) from a clinic and only kept the Truvada.
- I got it another way

**Please write how you got your PrEP drugs**

ANSWER THIS QUESTION IF ANSWER TO QUESTION WHERE DID YOU GET YOUR PREP DRUGS FROM? IS ANY OF I GOT IT ANOTHER WAY

## Contacting you

**What is your name?**

COMPULSORY QUESTION

**What is your email address?**

COMPULSORY QUESTION

**What is your telephone number?**

**Is it ok to leave a voicemail message on this number if we call but are not able to speak to you?**

- Yes
- No

**What is your preferred method of us contacting you?**

- Telephone
- Email
- Both telephone and email

**Please click on the "Submit Answers" button to save your responses.**
